# Supplementary material for: CARIMED (CARbon, tracers, and ancillary data In the MEDiterranean Sea): A ship-based data synthesis product – overview and quality control procedures
Source: Copernicus journal article supplement (doi:10.5194/essd-2025-759), 2025-12-27
Supplement: Supplementary file 1 [file essd-2025-759-supplement.pdf]

## Supplementary information for

# CARIMED (CARbon, tracers, and ancillary data In the MEDiterranean Sea): A ship-based data synthesis product – overview and quality control procedures

Marta Álvarez<sup>1</sup>, Maribel I. García-Ibáñez<sup>2,3</sup>, Nico Lange<sup>4,5</sup>, Alex Kozyr<sup>6</sup>, Antón Velo<sup>7</sup>, Toste Tanhua<sup>4</sup>, Giuseppe Civitarese<sup>8</sup>, Carolina Cantoni<sup>9</sup>, Malek Belgacem<sup>9</sup>, Katrin Schroeder<sup>9</sup>, Rubén Acerbi<sup>1</sup>, Laurent Coppola<sup>10</sup>, Thibaut Wagener<sup>11</sup>, Noelia M. Fajar<sup>12</sup>, Susana Flecha<sup>13</sup>, Michele Giani<sup>8</sup>, Louisa Giannoudi<sup>14</sup>, Elisa F. Guallart<sup>3</sup>, Abed El Rahman Hassoun<sup>3,15</sup>, Emma I. Huertas<sup>13</sup>, Valeria Ibello<sup>9,16</sup>, Mehdi A. Keraghel<sup>17</sup>, Ferial Louanchi<sup>17</sup>, Anna Luchetta<sup>9</sup>, Fiz F. Pérez<sup>7</sup>, Carsten Schirnack<sup>4</sup>, Ekaterini Souvermezoglou<sup>14</sup>, Lidia Urbini<sup>8</sup>, Monserrat Vidal<sup>18</sup>, Patrizia Ziveri<sup>19,20,21</sup>

<sup>1</sup>Centro Oceanográfico de A Coruña (COAC-IEO), CSIC, A Coruña, 15001, Spain

<sup>2</sup>Centro Oceanográfico de Baleares (COB-IEO), CSIC, Palma de Mallorca, 07015, Spain

<sup>3</sup>Institut de Ciències del Mar (ICM), CSIC, Barcelona, Spain

<sup>4</sup>GEOMAR Helmholtz Centre for Ocean Research Kiel, Kiel, Germany

<sup>5</sup>NORCE Norwegian Research Centre, Bjerknes Centre for Climate Research, Bergen, Norway

<sup>6</sup>OCADS, National Centers for Environmental Information, National Oceanic and Atmospheric Administration, U.S.A.

<sup>7</sup>Instituto de Investigaciones Marinas (IIM), CSIC, Vigo, 36208, Spain

<sup>8</sup>OGS-National Institut of Oceanography and Applied Geophysics, Trieste, Italy

<sup>9</sup>Consiglio Nazionale delle Ricerche-Istituto di Scienze Marine (CNR-ISMAR), Trieste/Venezia, Italy

<sup>10</sup>Sorbonne Université, CNRS, UMR 7093, Laboratoire d'Océanographie de Villefranche-sur-Mer (LOV), Villefranche-sur-Mer, France

<sup>11</sup>Aix Marseille Université, CNRS, IRD, MIO, Marseille, France

<sup>12</sup>Centro Oceanográfico de Vigo (COV-IEO), CSIC, Vigo, Spain

<sup>13</sup>Instituto de Ciencias Marinas de Andalucía (ICMAN), CSIC, Puerto Real, Cádiz, Spain

<sup>14</sup>Hellenic Centre for Marine Research, HCMR, Anavissos, Greece

<sup>15</sup>National Council for Scientific Research, National Center for Marine Sciences, Beirut, Lebanon

<sup>16</sup>Middle East Technical University, Institute of Marine Sciences, Mersin, Turkey

<sup>17</sup>Ecole Nationale Supérieure des Sciences de la Mer et de l'Aménagement du Littoral, ENSSMAL, Algiers, Algeria

<sup>18</sup>Universitat de Barcelona (UB), Barcelona, Spain

<sup>19</sup>Institute of Environmental Science and Technology (ICTA-UAB), Universitat Autònoma de Barcelona, Bellaterra, Spain

<sup>20</sup>Catalan Institution for Research and Advanced Studies (ICREA), Barcelona, Spain

<sup>21</sup>Department of Animal Biology, Plant Biology and Ecology (BABVE), Universitat Autònoma de Barcelona, Bellaterra, Spain

*Correspondence to:* Marta Álvarez (marta.alvarez@ieo.csic.es)

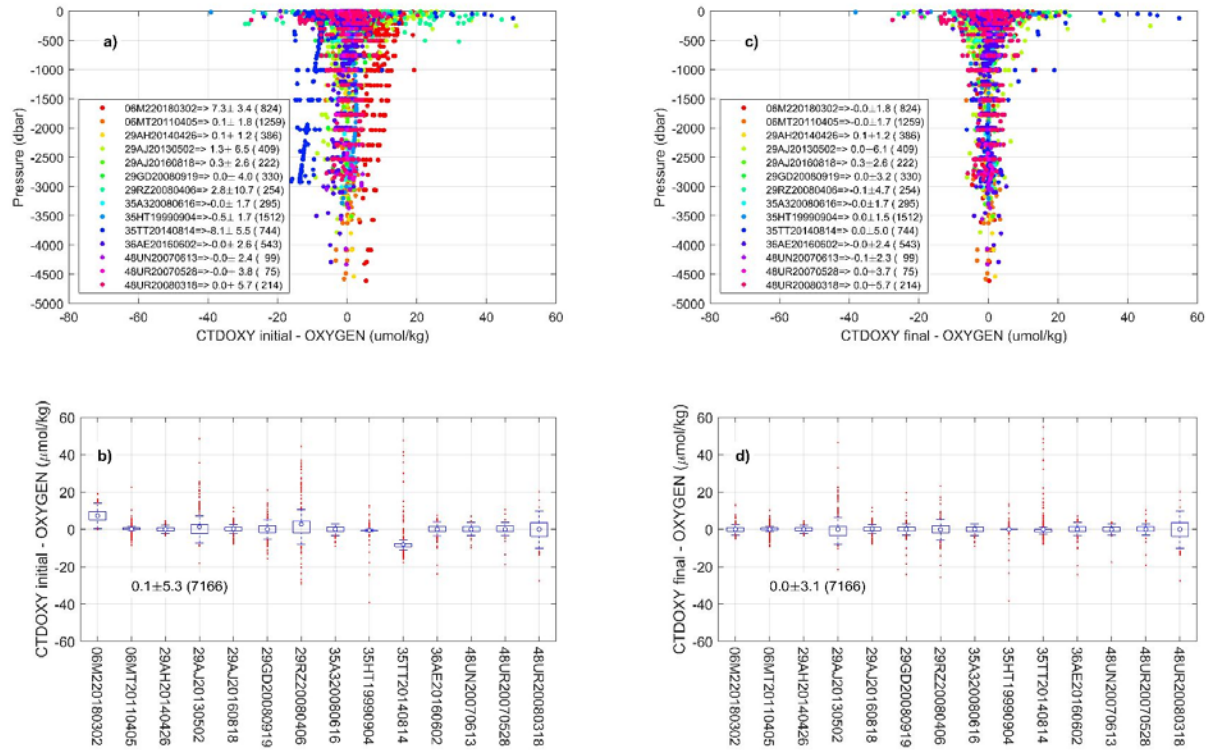

**Figure S1. Primary quality control of sensor-based dissolved oxygen (CTDOXY) against discrete Winkler oxygen (OXYGEN).** The figure illustrates the difference (CTDOXY-OXYGEN) before and after recalibration: (a) and (c) are scatter plots of the difference versus pressure, coloured by cruise. Cruise legends indicate the mean, standard deviation, and number of samples for the difference for each cruise (identified by its EXPOCODE). (b) and (d) are box-and-whisker plots showing the CTDOXY-OXYGEN differences grouped by cruise, before (b) and after (d) recalibration. In these plots, large red dots represent the cruise mean, small red dots denote outliers, and the overall mean and standard deviation are numerically indicated.

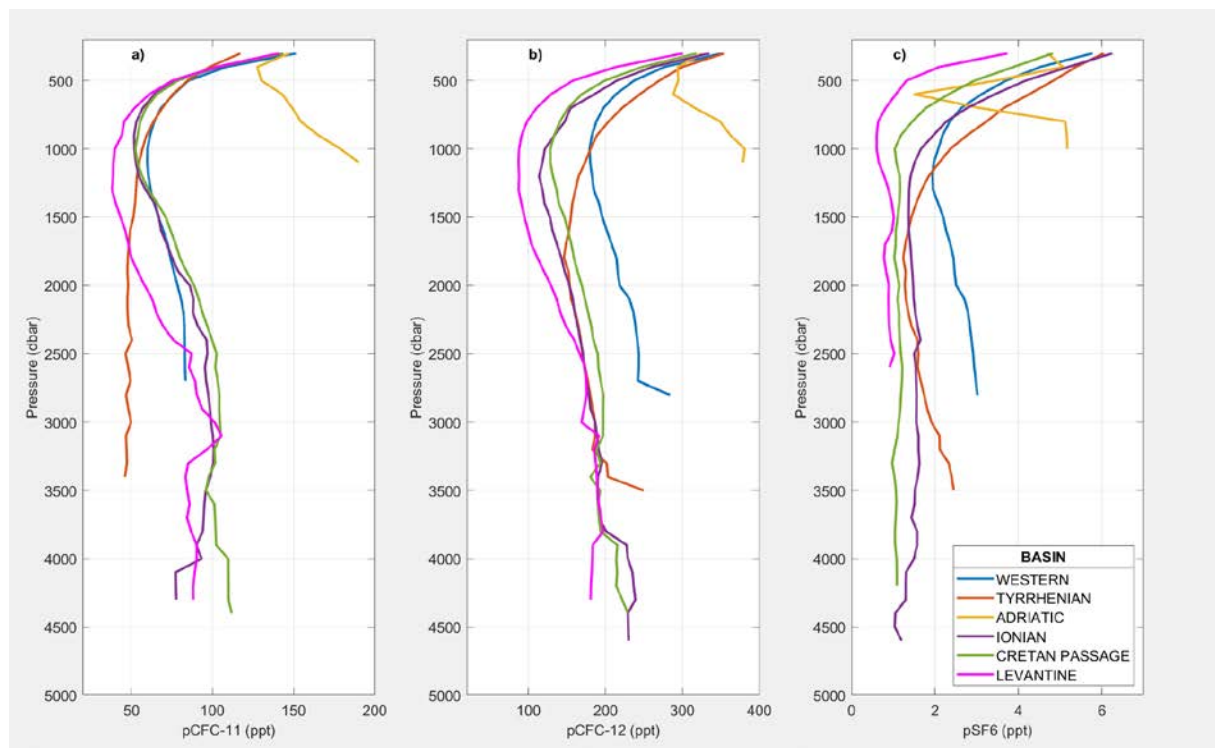

**Figure S2. Mean vertical profiles for the partial pressure of a) CFC-11, b) CFC-12, and c) SF<sub>6</sub> (all in parts per trillion, ppt) in the different Mediterranean Sea sub-basins using the CARIMED transient tracer dataset. The profiles are segregated by sub-basin region (Fig. S3): Western Mediterranean Basin comprises regions DF1 (Algero-Provençal) and DS1 (Alboran Sea), Tyrrhenian Basin comprises regions DT1 (Tyrrhenian North) and DT3 (Tyrrhenian South), Ionian Basin comprises regions DJ5, DJ7, and DJ8 (Ionian South, Ionian Middle West, and Ionian Middle East, respectively), Cretan Passage comprises region DH3 (Cretan Passage), and Levantine Basin comprises regions DL1, DL2, DL3, and DL4 (Levantine North, Levantine North-East, Levantine South, and Levantine South-East, respectively).**

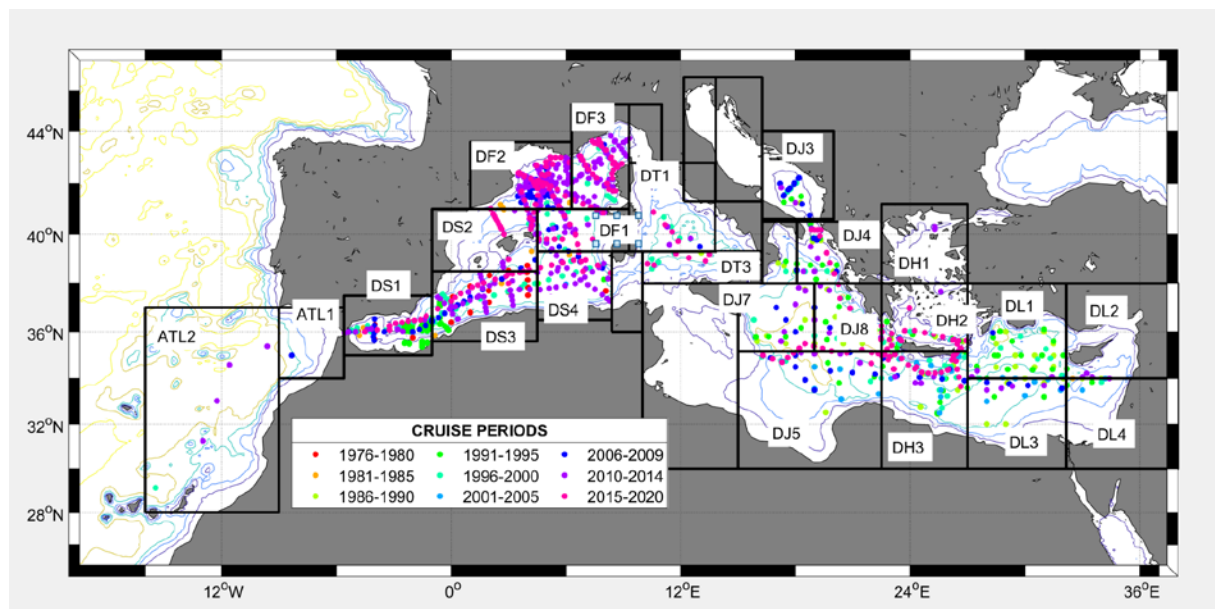

**Figure S3.** Map of the Mediterranean Sea showing the locations of the stations compiled in CARIMED that complied with the vertical pressure criteria used within the CARIMED 2QC framework, correspondingly divided into regional areas according to Manca et al. (2004). See Table S3 for more information.

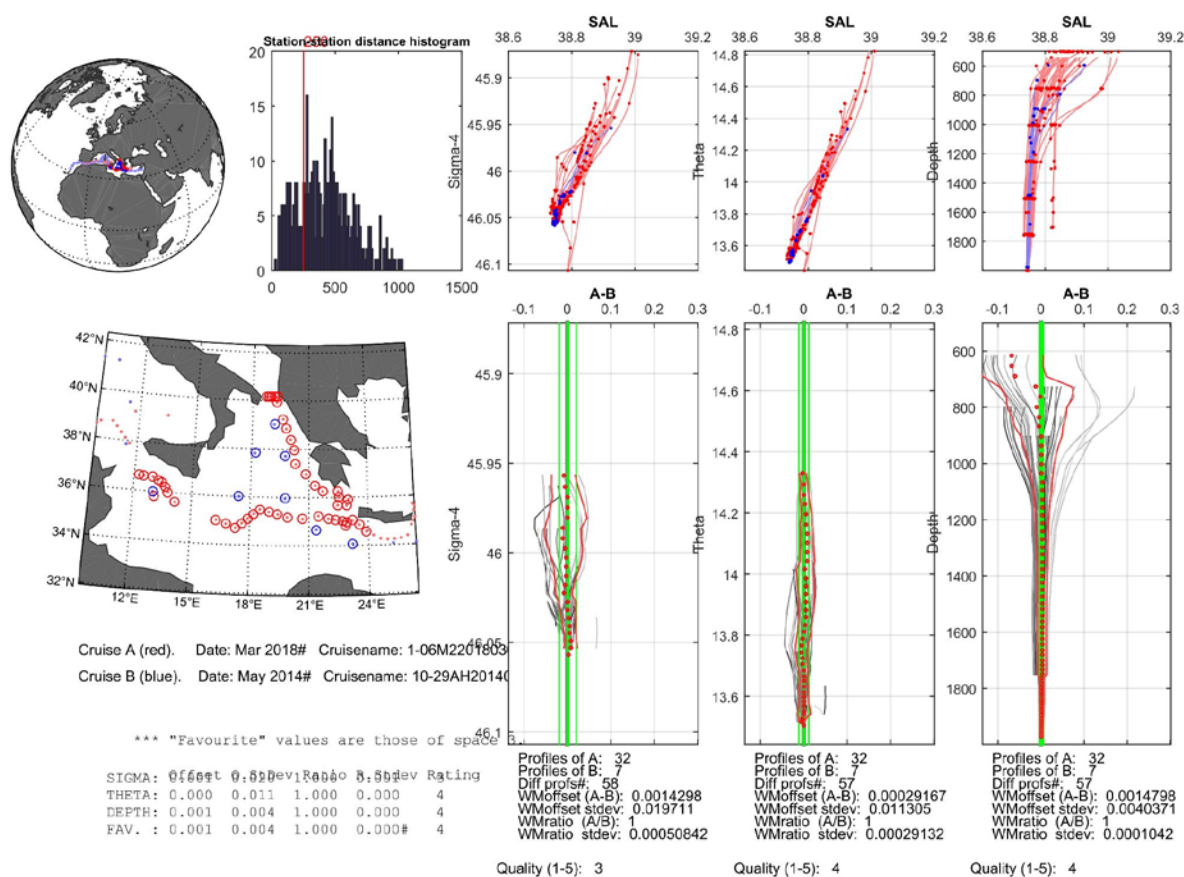

**Figure S4.** Additive salinity offset detected between the target cruise 06M220180302 (red) and the reference cruise 29AH20140426 (blue) in the Ionian Basin, illustrating a strong agreement between the two cruises, i.e., no adjustment required. The figure panels provide a complete overview of the crossover procedure: the top left panel shows the map of the full cruise transects, indicating spatial context, along with a histogram of the station-to-station distances (where the average distance is marked by a vertical red line); the bottom left panel displays the specific stations utilised for the crossover analysis; the top right panels present the measured vertical profiles of salinity for both cruises; and the bottom right panels display the differences between the two profiles (dotted red line) and the weighted average of these differences (solid green line), which represents the calculated offset. Statistical summaries and details of the analysis are provided in the bottom left corner and immediately beneath the profile difference panels.

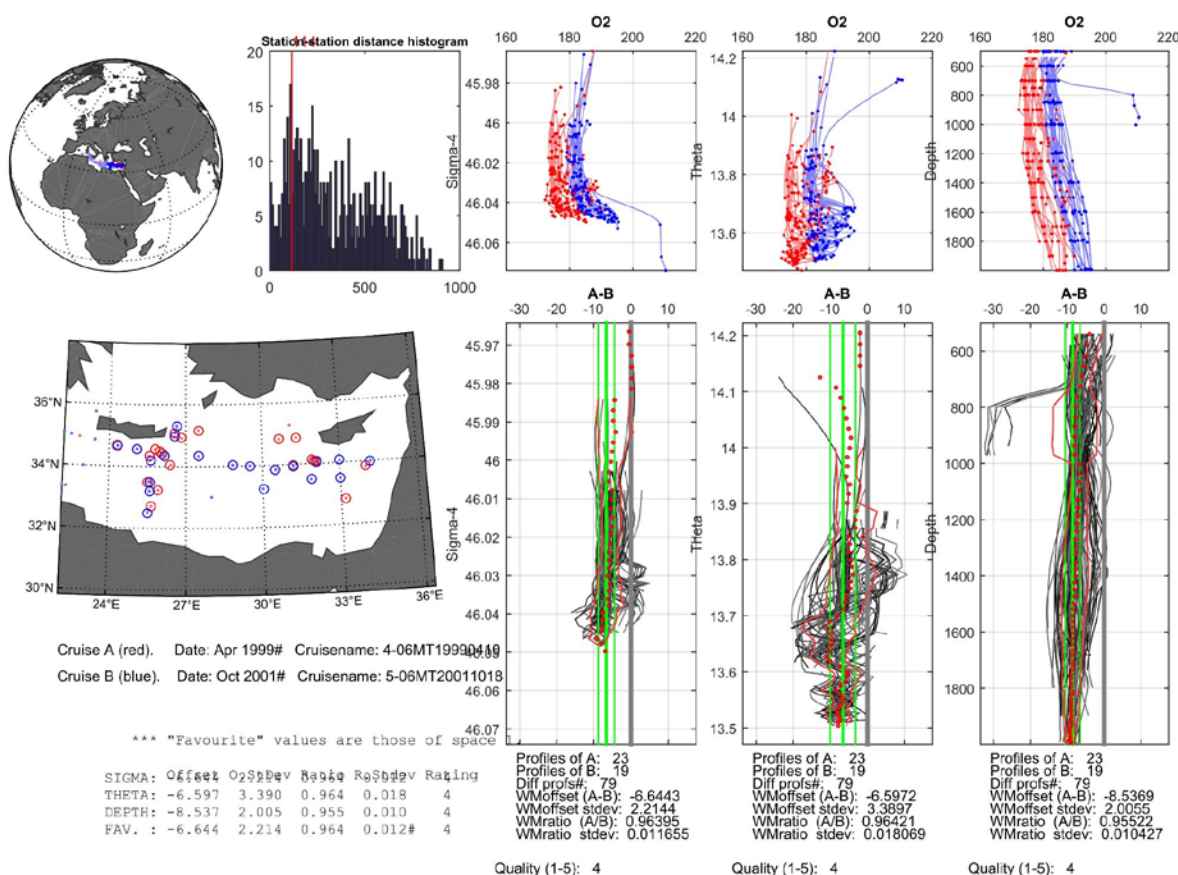

**Figure S5. Multiplicative oxygen offset detected between the target cruise 06MT19990410 (red) and the reference cruise 06MT20011018 (blue) in the Levantine Basin. The crossover analysis indicates that the oxygen values for cruise 06MT19990410 need to be increased by approximately 3% compared to 06MT20011018, requiring a multiplicative adjustment of about  $1/0.97=1.03$ . The figure panels provide a complete overview of the crossover procedure: the top left panel shows the map of the full cruise transects, indicating spatial context, along with a histogram of the station-to-station distances (where the average distance is marked by a vertical red line); the bottom left panel displays the specific stations utilised for the crossover analysis; the top right panels present the measured vertical profiles of salinity for both cruises; and the bottom right panels display the differences between the two profiles (dotted red line) and the weighted average of these differences (solid green line), which represents the calculated offset. Statistical summaries and details of the analysis are provided in the bottom left corner and immediately beneath the profile difference panels.**

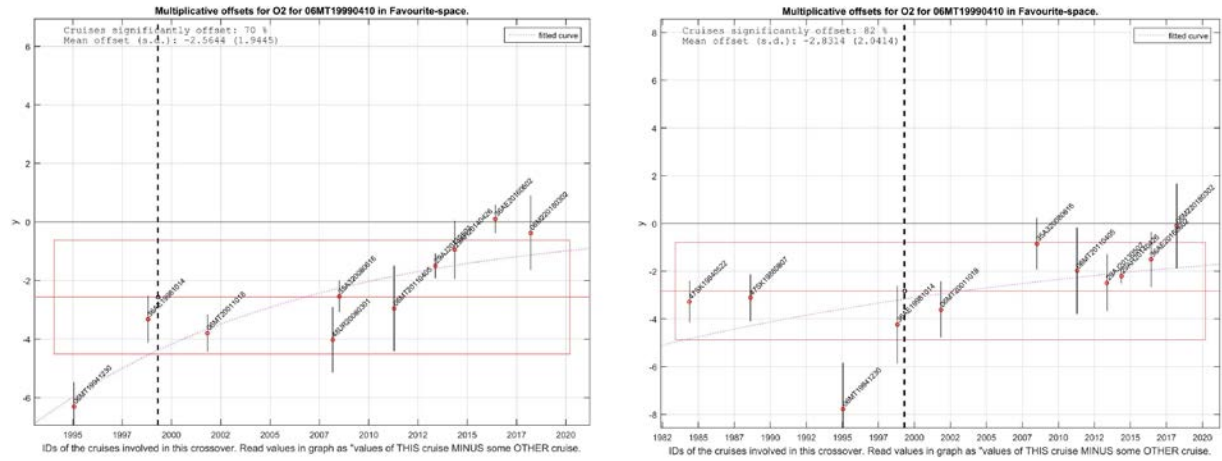

**Figure S6. Weighted mean and standard deviation of the oxygen multiplicative offsets for the target cruise 06MT19990410 relative to its crossover cruises in the Ionian (left panel) and Levantine (right panel) Basins. The analysis, illustrating the average deviation in the favourite crossover space, highlights a potential adjustment of -3% when compared with cruises sampled close in time. Notably, the figure demonstrates a temporal trend in the Ionian Basin and a distinct regime shift evident in the Levantine Basin.**



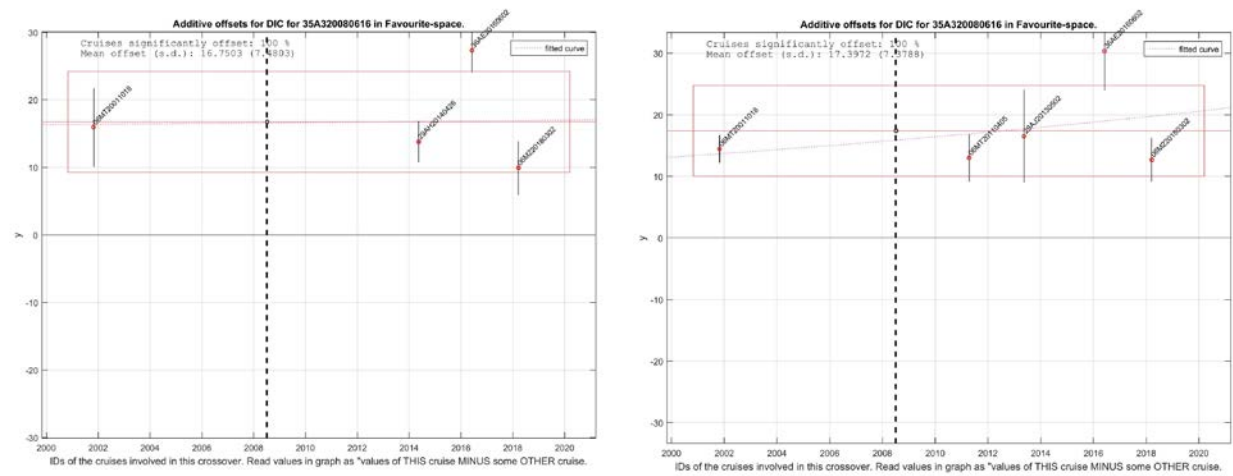

**Figure S7. Weighted mean and standard deviation of the DIC additive offsets for the target cruise 35A320080616 relative to its crossover cruises in the Ionian (left panel) and Levantine (right panel) Basins. The analysis, illustrating the average deviation in the favourite crossover space, highlights a potential adjustment of about  $-10 \mu\text{mol kg}^{-1}$  in both basins.**



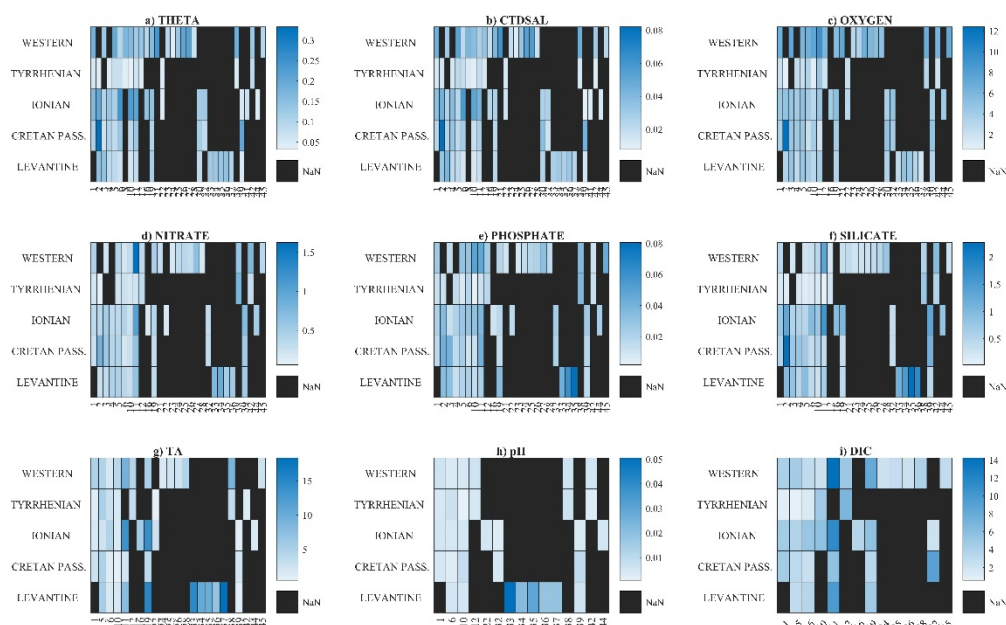

**Figure S8.** Heatmap illustrating the standard deviation of physical and biogeochemical variables, calculated for the depth layer with minimum temporal variability (Section 5.1), across each cruise included in CARIMED and grouped by sub-basin regions. This figure provides a preliminary inspection of the intra-cruise homogeneity (precision). The Mediterranean regions are grouped as follows: the Western Basin comprises regions DF1 (Algero-Provençal) and DS1 (Alboran Sea), the Tyrrhenian Basin comprises regions DT1 (Tyrrhenian Sea North) and DT3 (Tyrrhenian Sea South), the Ionian Basin comprises regions DJ5, DJ7, and DJ8 (Ionian South, Middle East, and West, respectively), the Cretan Passage comprises region DH3 (Cretan Passage), and the Levantine Basin comprises regions DL1, DL2, DL3, and DL4 (Levantine North, North East, South, and South East, respectively). Cruises can be identified by their cruise number using Tables 1 and S2. The variables depicted are: a) potential temperature (THETA in °C), b) salinity (CTDSAL), c) dissolved oxygen (OXYGEN in  $\mu\text{mol kg}^{-1}$ ), d to f) dissolved inorganic nutrients (all in  $\mu\text{mol kg}^{-1}$ ), g) total alkalinity (TA in  $\mu\text{mol kg}^{-1}$ ), h) pH on the total hydrogen ion scale at 25°C (pH), and i) total dissolved inorganic carbon (DIC in  $\mu\text{mol kg}^{-1}$ ).

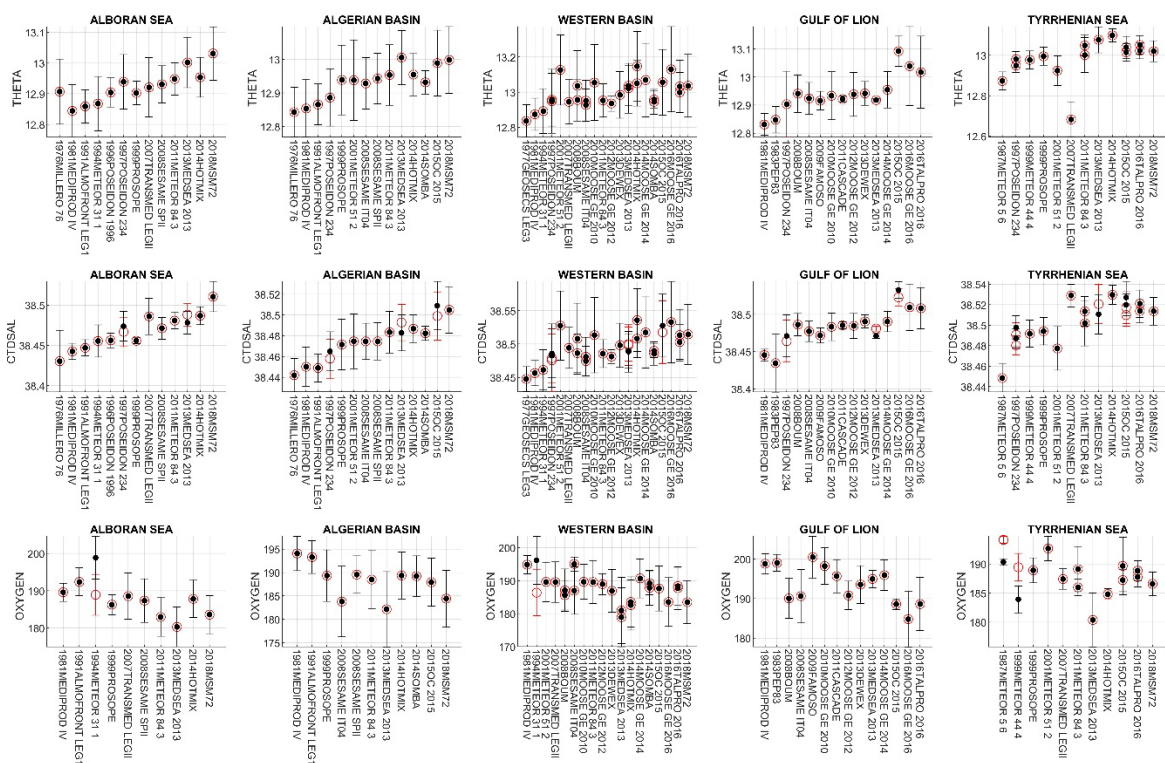

**Figure S9.** Mean and standard deviation values for physical and biogeochemical variables, calculated for the depth layers with minimum temporal variability (Section 5.1), CARIMED cruise and Mediterranean Sea grouped sub-basin regions according to Manca et al. (2004) classification (Fig. S3 and Table S3). The Alboran Sea comprises region DS1; the Algerian Basin comprises region DS3 (Algerian West); the Western Basin comprises regions DF1 (Algero-Provençal) and DS1 (Alboran Sea); the Gulf of Lion comprises region DF2; the Tyrrhenian Basin comprises regions DT1 (Tyrrhenian North) and DT3 (Tyrrhenian South). Cruises can be identified with the cruise number in Table 1 and S2. Variables are potential temperature (THETA in °C), salinity, and dissolved oxygen (in μmol kg<sup>-1</sup>). Black dots correspond to the original data, red circles are bias-corrected data.

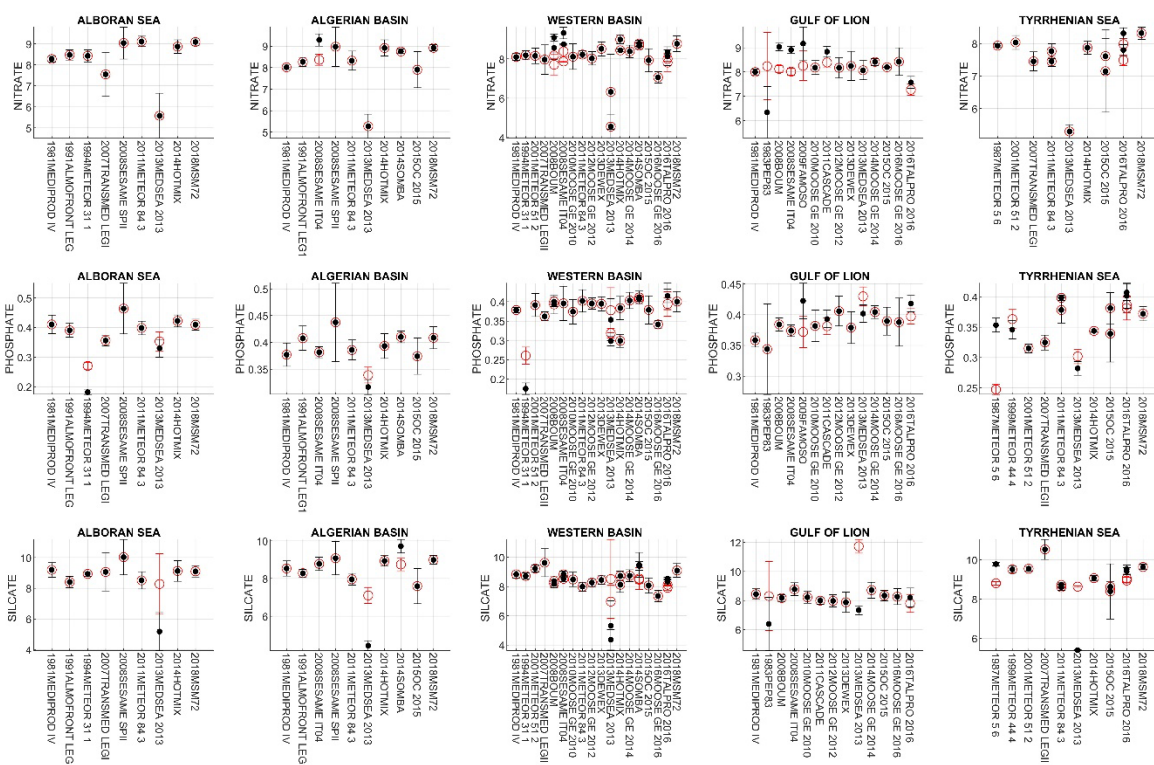

**Figure S10.** Mean and standard deviation values for physical and biogeochemical variables, calculated for the depth layers with minimum temporal variability (Section 5.1), CARIMED cruise and Mediterranean Sea grouped sub-basin regions according to Manca et al. (2004) classification (Fig. S3 and Table S3). The Alboran Sea comprises region DS1; the Algerian Basin comprises region DS3 (Algerian West); the Western Basin comprises regions DF1 (Algero-Provençal) and DS1 (Alboran Sea); the Gulf of Lion comprises region DF2; the Tyrrhenian Basin comprises regions DT1 (Tyrrhenian North) and DT3 (Tyrrhenian South). Cruises can be identified with the cruise number in Table 1 and S2. Variables are dissolved inorganic nutrients: nitrate, phosphate, and silicate (all in  $\mu\text{mol kg}^{-1}$ ). Black dots correspond to the original data, red circles are bias-corrected data.

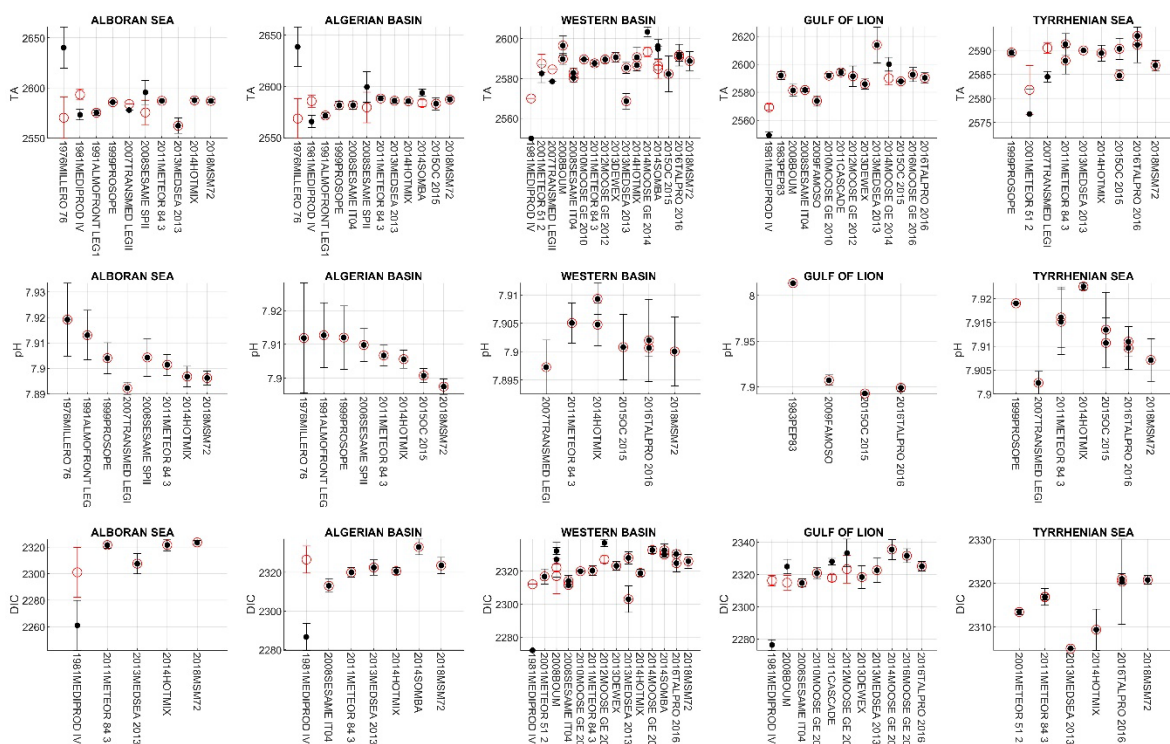

**Figure S11.** Mean and standard deviation values for physical and biogeochemical variables, calculated for the depth layers with minimum temporal variability (Section 5.1), CARIMED cruise and Mediterranean Sea grouped sub-basin regions according to Manca et al. (2004) classification (Fig. S3 and Table S3). The Alboran Sea comprises region DS1; the Algerian Basin comprises region DS3 (Algerian West); the Western Basin comprises regions DF1 (Algero-Provençal) and DS1 (Alboran Sea); the Gulf of Lion comprises region DF2; the Tyrrhenian Basin comprises regions DT1 (Tyrrhenian North) and DT3 (Tyrrhenian South). Cruises can be identified with the cruise number in Table 1 and S2. Variables are total alkalinity (TA in  $\mu\text{mol kg}^{-1}$ ), pH on the total hydrogen ion scale at 25°C (pH), and total dissolved inorganic carbon (DIC in  $\mu\text{mol kg}^{-1}$ ). Black dots correspond to the original data, red circles are bias-corrected data.

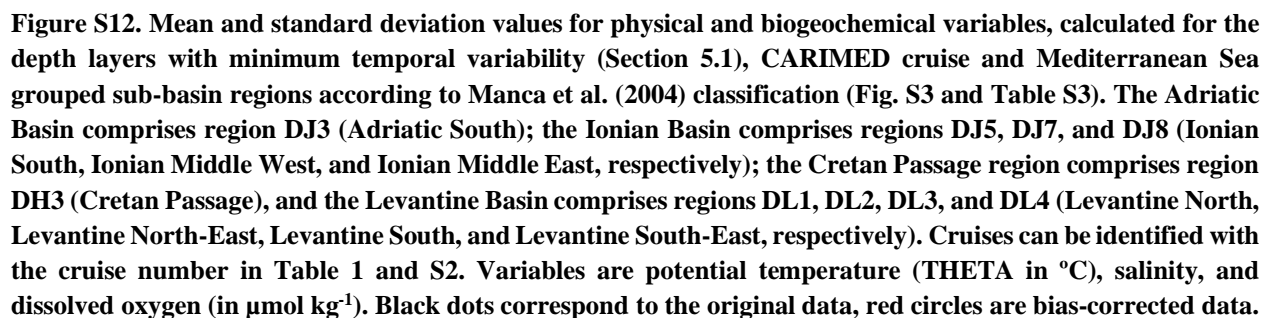

**Figure S12.** Mean and standard deviation values for physical and biogeochemical variables, calculated for the depth layers with minimum temporal variability (Section 5.1), CARIMED cruise and Mediterranean Sea grouped sub-basin regions according to Manca et al. (2004) classification (Fig. S3 and Table S3). The Adriatic Basin comprises region DJ3 (Adriatic South); the Ionian Basin comprises regions DJ5, DJ7, and DJ8 (Ionian South, Ionian Middle West, and Ionian Middle East, respectively); the Cretan Passage region comprises region DH3 (Cretan Passage), and the Levantine Basin comprises regions DL1, DL2, DL3, and DL4 (Levantine North, Levantine North-East, Levantine South, and Levantine South-East, respectively). Cruises can be identified with the cruise number in Table 1 and S2. Variables are potential temperature (THETA in °C), salinity, and dissolved oxygen (in  $\mu\text{mol kg}^{-1}$ ). Black dots correspond to the original data, red circles are bias-corrected data.



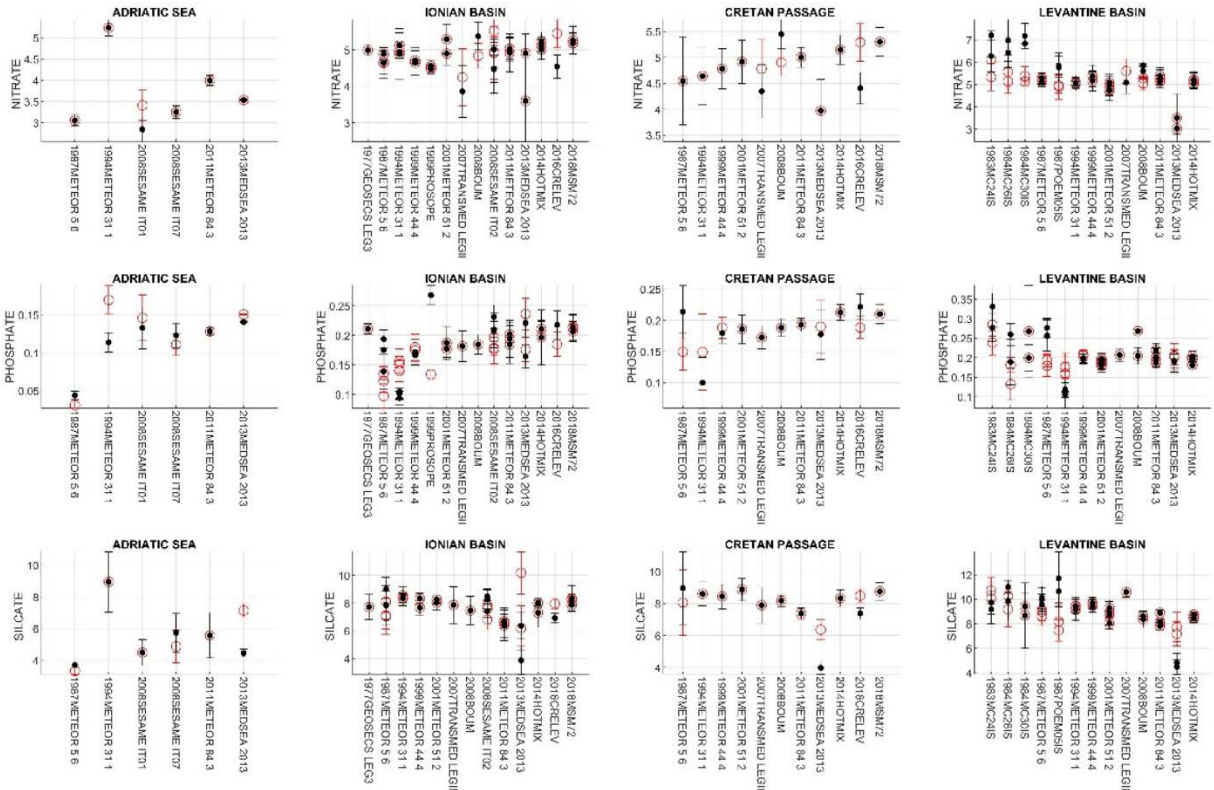

**Figure S13.** Mean and standard deviation values for biogeochemical variables, calculated for the depth layers with minimum temporal variability (Section 5.1), CARIMED cruise and Mediterranean Sea grouped sub-basin regions according to Manca et al. (2004) classification (Fig. S3 and Table S3). The Adriatic Basin comprises region DJ3 (Adriatic South); the Ionian Basin comprises regions DJ5, DJ7, and DJ8 (Ionian South, Ionian Middle West, and Ionian Middle East, respectively); the Cretan Passage region comprises region DH3 (Cretan Passage), and the Levantine Basin comprises regions DL1, DL2, DL3, and DL4 (Levantine North, Levantine North-East, Levantine South, and Levantine South-East, respectively). Cruises can be identified with the cruise number in Table 1 and S2. Variables are dissolved inorganic nutrients: nitrate, phosphate, and silicate (all in  $\mu\text{mol kg}^{-1}$ ). Black dots correspond to the original data, red circles are bias-corrected data

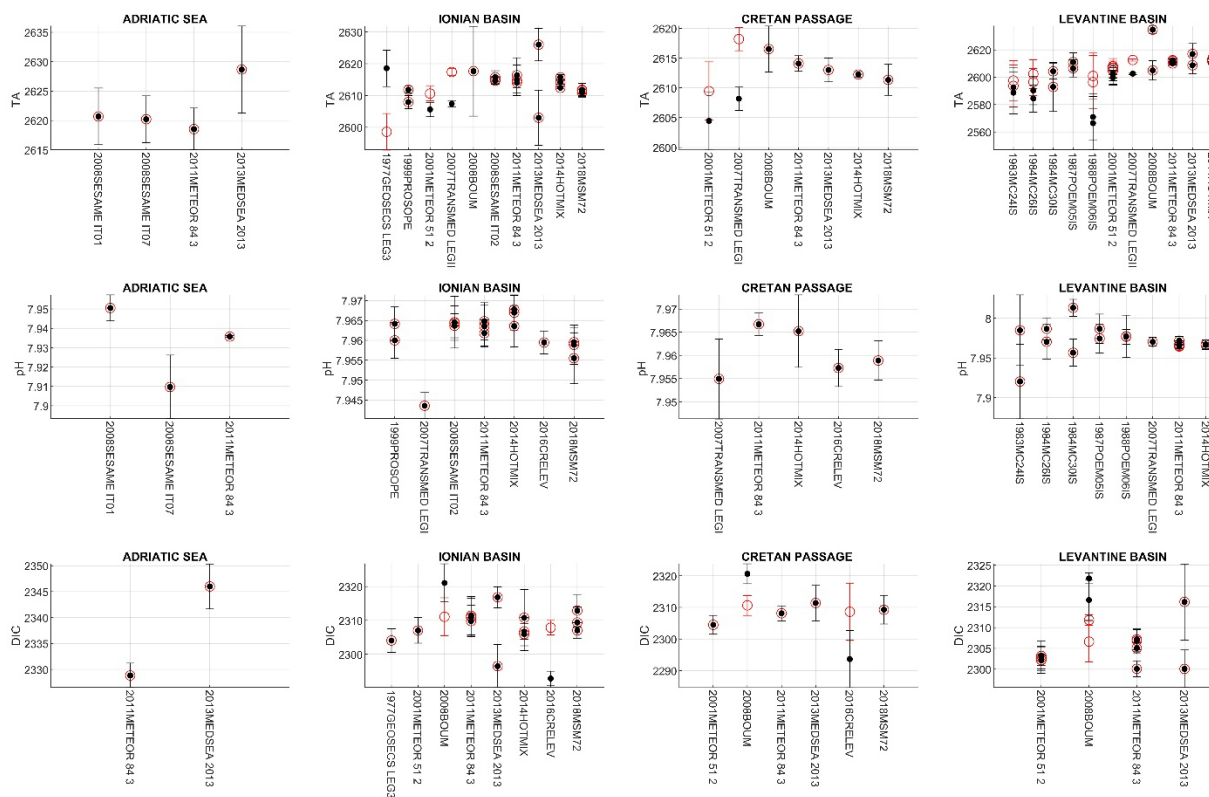

**Figure S14.** Mean and standard deviation values for biogeochemical variables, calculated for the depth layers with minimum temporal variability (Section 5.1), CARIMED cruise and Mediterranean Sea grouped sub-basin regions according to Manca et al. (2004) classification (Fig. S3 and Table S3). The Adriatic Basin comprises region DJ3 (Adriatic South); the Ionian Basin comprises regions DJ5, DJ7, and DJ8 (Ionian South, Ionian Middle West, and Ionian Middle East, respectively); the Cretan Passage region comprises region DH3 (Cretan Passage), and the Levantine Basin comprises regions DL1, DL2, DL3, and DL4 (Levantine North, Levantine North-East, Levantine South, and Levantine South-East, respectively). Cruises can be identified with the cruise number in Table 1 and S2. Variables are total alkalinity (TA in  $\mu\text{mol kg}^{-1}$ ), pH on the total hydrogen ion scale at 25°C (pH), and total dissolved inorganic carbon (DIC in  $\mu\text{mol kg}^{-1}$ ). Black dots correspond to the original data, red circles are bias-corrected data.



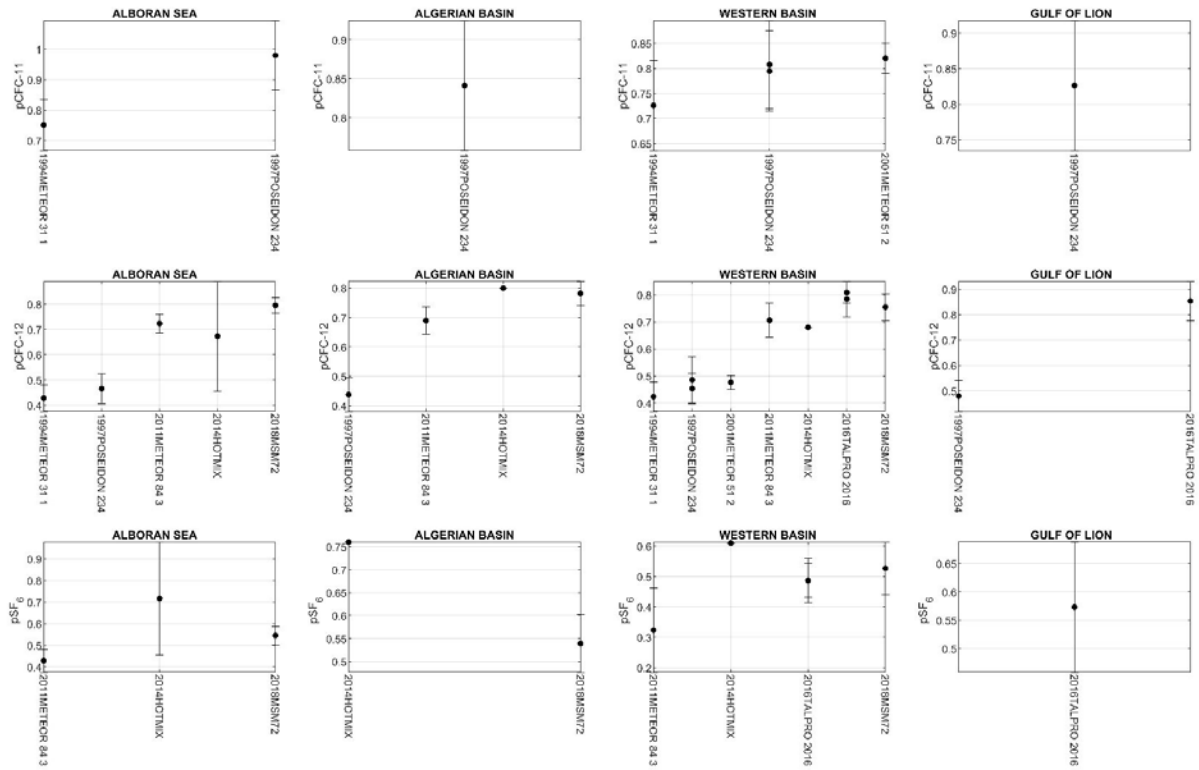

**Figure S15.** Mean and standard deviation values for the partial pressure of CFC-11, CFC-12, and SF6 (all in ppt), calculated for the depth layers with minimum temporal variability (Section 5.1), CARIMED cruise and Mediterranean Sea grouped sub-basin regions according to Manca et al. (2004) classification (Fig. S3 and Table S3). The Alboran Sea comprises region DS1; the Algerian Basin comprises region DS3 (Algerian West); the Western Basin comprises regions DF1 (Algero-Provençal) and DS1 (Alboran Sea) and the Gulf of Lion comprises region DF2.

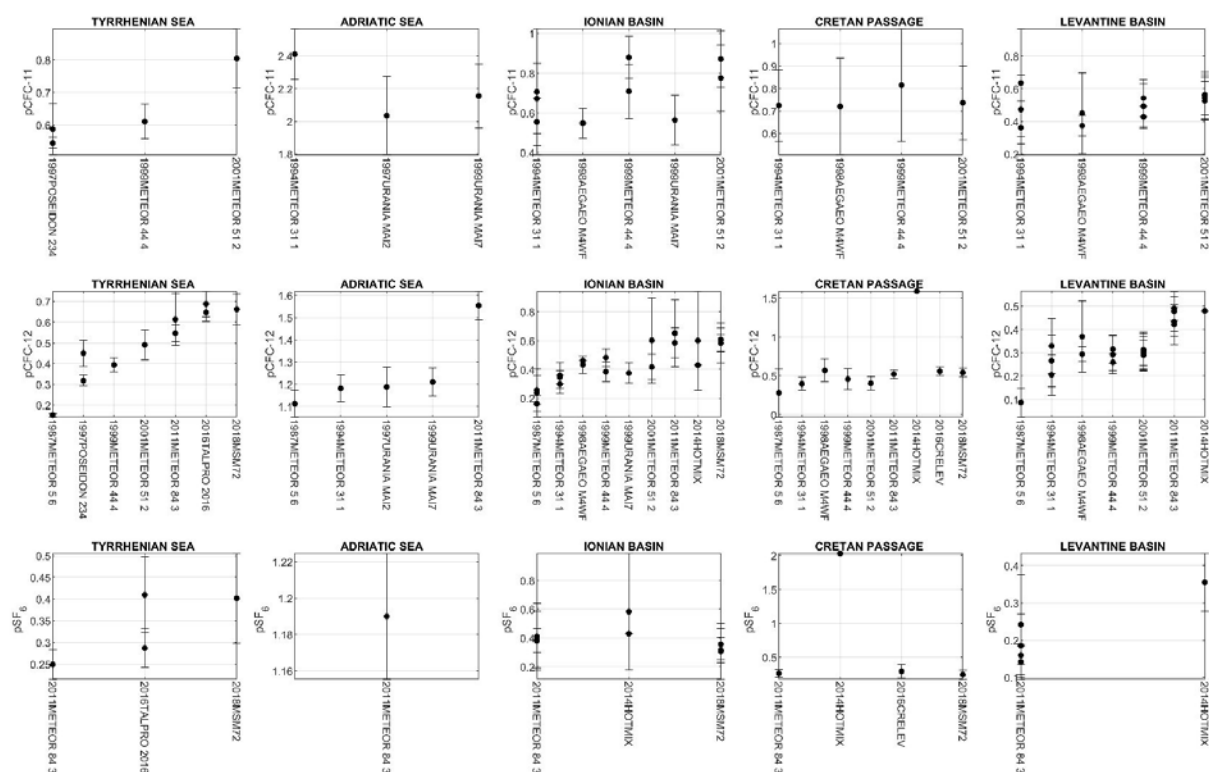

**Figure S16.** Mean and standard deviation values for the partial pressure of CFC-11, CFC-12, and SF6 (all in ppt), calculated for the depth layers with minimum temporal variability (Section 5.1), CARIMED cruise and Mediterranean Sea grouped sub-basin regions according to Manca et al. (2004) classification (Fig. S3 and Table S3). The Tyrrhenian Basin comprises regions DT1 (Tyrrhenian North) and DT3 (Tyrrhenian South); the Adriatic Basin comprises region DJ3 (Adriatic South); the Ionian Basin comprises regions DJ5, DJ7, and DJ8 (Ionian South, Ionian Middle East, and Ionian West, respectively); the Cretan Passage region comprises region DH3 (Cretan Passage), and the Levantine Basin comprises regions DL1, DL2, DL3, and DL4 (Levantine North, Levantine North-East, Levantine South, and Levantine South-East, respectively).

**Table S1. Variable names in the CARIMED original cruise data files along with their corresponding header, units, and flag headers. Individual cruise files are formatted to WHP Exchange Format providing data and metadata in a comma delimited file available in the CARIMED OCADS site.**

| Variable                                                          | Header     | Units                   | Flag Header       |
|-------------------------------------------------------------------|------------|-------------------------|-------------------|
| Expedition code                                                   | EXPCODE    |                         |                   |
| Station                                                           | STNNBR     |                         |                   |
| Cast                                                              | CASTNO     |                         |                   |
| Niskin Bottle                                                     | SAMPNO     |                         |                   |
| Date (YYYYMMDD)                                                   | DATE       |                         |                   |
| Hour (HHMM)                                                       | TIME       |                         |                   |
| Latitude                                                          | LATITUDE   | Decimal degree          |                   |
| Longitude                                                         | LONGITUDE  | Decimal degree          |                   |
| CTD Pressure                                                      | CTDPRS     | Decibar                 |                   |
| CTD Temperature (ITS-90)                                          | CTDTMP     | Degree Celsius          |                   |
| CTD Salinity (PSS-78)                                             | CTDSAL     |                         | CTDSAL_FLAG_W     |
| Salinometer Salinity (PSS-78)                                     | SALNTY     |                         | SALNTY_FLAG_W     |
| CTD Oxygen                                                        | CTDOXY     | $\mu\text{mol kg}^{-1}$ | CTDOXY_FLAG_W     |
| Winkler Oxygen                                                    | OXYGEN     | $\mu\text{mol kg}^{-1}$ | OXYGEN_FLAG_W     |
| Silicate                                                          | SILCAT     | $\mu\text{mol kg}^{-1}$ | SILCAT_FLAG_W     |
| Nitrate+Nitrite                                                   | NITRAT     | $\mu\text{mol kg}^{-1}$ | NITRAT_FLAG_W     |
| Nitrite                                                           | NITRIT     | $\mu\text{mol kg}^{-1}$ | NITRIT_FLAG_W     |
| Phosphate                                                         | PHSPHT     | $\mu\text{mol kg}^{-1}$ | PHSPHT_FLAG_W     |
| Total Dissolved Inorganic Carbon                                  | TCARBN     | $\mu\text{mol kg}^{-1}$ | TCARBN_FLAG_W     |
| Total Alkalinity                                                  | ALKALI     | $\mu\text{mol kg}^{-1}$ | ALKALI_FLAG_W     |
| pH on the total hydrogen ion scale at 25°C and 0 dbar of pressure | PH_TOT_25C |                         | PH_TOT_25C_FLAG_W |
| Chlorofluorocarbon 11                                             | CFC-11     | $\text{pmol kg}^{-1}$   | CFC-11_FLAG_W     |
| Chlorofluorocarbon 12                                             | CFC-12     | $\text{pmol kg}^{-1}$   | CFC-12_FLAG_W     |
| Chlorofluorocarbon 113                                            | CFC-113    | $\text{pmol kg}^{-1}$   | CFC113_FLAG_W     |
| Sulfur hexafluoride                                               | SF6        | $\text{fmol kg}^{-1}$   | SF6_FLAG_W        |
| Carbon tetrachloride                                              | CCL4       | $\text{pmol kg}^{-1}$   | CCL4_FLAG_W       |
| Tritium ( $^3\text{H}$ )                                          | TRITUM     | TU                      | TRITUM_FLAG_W     |
| $^3\text{H}$ counting error                                       | TRITER     | TU                      |                   |
| Helium (He)                                                       | HELIUM     | $\text{nmol kg}^{-1}$   | HELIUM_FLAG_W     |
| He counting error                                                 | HELIER     | $\text{nmol kg}^{-1}$   |                   |
| $\delta^3\text{He}$                                               | DELHE3     | %                       | DELHE3_FLAG_W     |
| $\delta^3\text{He}$ counting error                                | DELHER     | %                       |                   |
| Neon (Ne)                                                         | NEON       | $\text{nmol kg}^{-1}$   | NEON_FLAG_W       |
| Ne counting error                                                 | NEONER     | $\text{nmol kg}^{-1}$   |                   |

**Table S2. CARIMED cruise summary table with the cruise number, year, EXPOCODE, cruise alias, and DOI (cruise data). The assigned cruise number follows the alphabetical ordering of EXPOCODEs.**

| Cruise # | Year | EXPOCODE     | Alias           | DOI                                                                                                                       |
|----------|------|--------------|-----------------|---------------------------------------------------------------------------------------------------------------------------|
| 1        | 2018 | 06M220180302 | MSM72           | <a href="https://doi.org/10.25921/02fs-yt72">https://doi.org/10.25921/02fs-yt72</a>                                       |
| 2        | 1987 | 06MT19870818 | METEOR_5_6      | <a href="https://doi.org/10.7289/v58s4n8g">https://doi.org/10.7289/v58s4n8g</a>                                           |
| 3        | 1994 | 06MT19941230 | METEOR_31_1     | <a href="https://doi.org/10.25921/6k3e-3x27">https://doi.org/10.25921/6k3e-3x27</a>                                       |
| 4        | 1999 | 06MT19990410 | METEOR_44_4     | <a href="https://doi.org/10.25921/hn7s-ss77">https://doi.org/10.25921/hn7s-ss77</a>                                       |
| 5        | 2001 | 06MT20011018 | METEOR_51_2     | <a href="https://doi.org/10.3334/cdiac/otg.carina_06mt20011018">https://doi.org/10.3334/cdiac/otg.carina_06mt20011018</a> |
| 6        | 2011 | 06MT20110405 | METEOR_84_3     | <a href="https://doi.org/10.3334/cdiac/otg.clivar_06mt20110405">https://doi.org/10.3334/cdiac/otg.clivar_06mt20110405</a> |
| 7        | 1996 | 06PO19960522 | POSEIDON_1996   | <a href="https://doi.org/10.25921/fscp-wn85">https://doi.org/10.25921/fscp-wn85</a>                                       |
| 8        | 1997 | 06PO19971023 | POSEIDON_234    | <a href="https://doi.org/10.25921/f2z2-2437">https://doi.org/10.25921/f2z2-2437</a>                                       |
| 9        | 2009 | 29AH20090310 | FAMOSO          | <a href="https://doi.org/10.25921/yets-v572">https://doi.org/10.25921/yets-v572</a>                                       |
| 10       | 2014 | 29AH20140426 | HOTMIX          | <a href="https://doi.org/10.25921/xj90-7150">https://doi.org/10.25921/xj90-7150</a>                                       |
| 11       | 2013 | 29AJ20130502 | MEDSEA_2013     | <a href="https://doi.org/10.7289/v5n87832">https://doi.org/10.7289/v5n87832</a>                                           |
| 12       | 2016 | 29AJ20160818 | TALPRO_2016     | <a href="https://doi.org/10.25921/8f6a-zq94">https://doi.org/10.25921/8f6a-zq94</a>                                       |
| 13       | 1983 | 29GD19830629 | PEP83           | <a href="https://doi.org/10.25921/n816-dy55">https://doi.org/10.25921/n816-dy55</a>                                       |
| 14       | 2008 | 29GD20080919 | SESAME_SPII     | <a href="https://doi.org/10.25921/0w06-rf56">https://doi.org/10.25921/0w06-rf56</a>                                       |
| 15       | 2008 | 29RZ20080406 | SESAME_SPI      | <a href="https://doi.org/10.25921/qb64-tc92">https://doi.org/10.25921/qb64-tc92</a>                                       |
| 16       | 1977 | 318M19771204 | GEOSECS_LEG3    | <a href="https://doi.org/10.25921/4wfp-mm25">https://doi.org/10.25921/4wfp-mm25</a>                                       |
| 17       | 1976 | 31GI19760901 | MILLERO_76      | <a href="https://doi.org/10.25921/88c2-h343">https://doi.org/10.25921/88c2-h343</a>                                       |
| 18       | 1991 | 35A319910424 | ALMOFRONT_LEG1  | <a href="https://doi.org/10.25921/tez6-cn71">https://doi.org/10.25921/tez6-cn71</a>                                       |
| 19       | 2008 | 35A320080616 | BOUM            | <a href="https://doi.org/10.25921/xtgz-jr54">https://doi.org/10.25921/xtgz-jr54</a>                                       |
| 20       | 2011 | 35A320110301 | CASCADE         | <a href="https://doi.org/10.25921/mbs-5k19">https://doi.org/10.25921/mbs-5k19</a>                                         |
| 21       | 2016 | 35A320160519 | MOOSE_GE_2016   | <a href="https://doi.org/10.25921/mkbt-aj94">https://doi.org/10.25921/mkbt-aj94</a>                                       |
| 22       | 1999 | 35HT19990904 | PROSOPE         | <a href="https://doi.org/10.25921/e2jv-9e03">https://doi.org/10.25921/e2jv-9e03</a>                                       |
| 23       | 1981 | 35JC19811020 | MEDIPROD_IV     | <a href="https://doi.org/10.25921/h5rx-0t25">https://doi.org/10.25921/h5rx-0t25</a>                                       |
| 24       | 2012 | 35LU20120723 | MOOSE_GE_2012   | <a href="https://doi.org/10.25921/xx8w-gz31">https://doi.org/10.25921/xx8w-gz31</a>                                       |
| 25       | 2013 | 35LU20130201 | DEWEX           | <a href="https://doi.org/10.25921/eav3-2q34">https://doi.org/10.25921/eav3-2q34</a>                                       |
| 26       | 2014 | 35LU20140704 | MOOSE_GE_2014   | <a href="https://doi.org/10.25921/c430-sp25">https://doi.org/10.25921/c430-sp25</a>                                       |
| 27       | 2010 | 35TT20100525 | MOOSE_GE_2010   | <a href="https://doi.org/10.25921/1r3e-te72">https://doi.org/10.25921/1r3e-te72</a>                                       |
| 28       | 2014 | 35TT20140814 | SOMBA           | <a href="https://doi.org/10.25921/2ka0-nj81">https://doi.org/10.25921/2ka0-nj81</a>                                       |
| 29       | 1995 | 36AE19950209 | OTRANTO_5       | <a href="https://doi.org/10.3334/cdiac/otg.hcmr_otr5_1995">https://doi.org/10.3334/cdiac/otg.hcmr_otr5_1995</a>           |
| 30       | 1998 | 36AE19981014 | AEGAE0_M4WF     | <a href="https://doi.org/10.7289/v5s180sx">https://doi.org/10.7289/v5s180sx</a>                                           |
| 31       | 2013 | 36AE20131004 | PERSEUS_2013    | <a href="https://doi.org/10.25921/jvqg-mv55">https://doi.org/10.25921/jvqg-mv55</a>                                       |
| 32       | 2016 | 36AE20160602 | CRELEV          | <a href="https://doi.org/10.25921/c01n-sv64">https://doi.org/10.25921/c01n-sv64</a>                                       |
| 33       | 1983 | 47SK19831005 | MC24IS          | <a href="https://doi.org/10.25921/4a8h-zf31">https://doi.org/10.25921/4a8h-zf31</a>                                       |
| 34       | 1984 | 47SK19840522 | MC26IS          | <a href="https://doi.org/10.25921/3j55-0f80">https://doi.org/10.25921/3j55-0f80</a>                                       |
| 35       | 1984 | 47SK19841204 | MC30IS          | <a href="https://doi.org/10.25921/wzex-ef03">https://doi.org/10.25921/wzex-ef03</a>                                       |
| 36       | 1987 | 47SK19870824 | POEM05IS        | <a href="https://doi.org/10.25921/8bh1-tb18">https://doi.org/10.25921/8bh1-tb18</a>                                       |
| 37       | 1988 | 47SK19880807 | POEM06IS        | <a href="https://doi.org/10.25921/ts1g-x108">https://doi.org/10.25921/ts1g-x108</a>                                       |
| 38       | 2015 | 48QL20150804 | OC_2015         | <a href="https://doi.org/10.25921/4jxh-q088">https://doi.org/10.25921/4jxh-q088</a>                                       |
| 39       | 2007 | 48UN20070613 | TRANSMED_LEGIII | <a href="https://doi.org/10.25921/902g-w994">https://doi.org/10.25921/902g-w994</a>                                       |
| 40       | 1997 | 48UR19970830 | URANIA_MAI2     | <a href="https://doi.org/10.25921/g4pn-7922">https://doi.org/10.25921/g4pn-7922</a>                                       |
| 41       | 1999 | 48UR19990211 | URANIA_MAI7     | <a href="https://doi.org/10.25921/zft1-g981">https://doi.org/10.25921/zft1-g981</a>                                       |
| 42       | 2007 | 48UR20070528 | TRANSMED_LEGII  | <a href="https://doi.org/10.25921/1npj-cs69">https://doi.org/10.25921/1npj-cs69</a>                                       |
| 43       | 2008 | 48UR20080215 | SESAME_IT01     | <a href="https://doi.org/10.25921/bzcp-p786">https://doi.org/10.25921/bzcp-p786</a>                                       |
| 44       | 2008 | 48UR20080301 | SESAME_IT02     | <a href="https://doi.org/10.25921/mbxk-he35">https://doi.org/10.25921/mbxk-he35</a>                                       |
| 45       | 2008 | 48UR20080318 | SESAME_IT04     | <a href="https://doi.org/10.25921/fzpc-d148">https://doi.org/10.25921/fzpc-d148</a>                                       |
| 46       | 2008 | 48UR20081007 | SESAME_IT07     | <a href="https://doi.org/10.25921/satj-p906">https://doi.org/10.25921/satj-p906</a>                                       |

**Table S3. Code names and regional areas defined by Manca et al. (2004), illustrated in Figure S3.**

| CODE | AREA             |
|------|------------------|
| DF2  | Gulf of Lion     |
| DF3  | Liguro Provençal |
| DF4  | Ligurian East    |
| DS2  | Balearic Sea     |
| DF1  | Algero Provençal |
| DS1  | Alboran Sea      |
| DS3  | Algerian West    |
| DS4  | Algerian East    |
| DT1  | Tyrrhenian North |
| DT2  | Tyrrhenian East  |
| DT3  | Tyrrhenian South |
| DI1  | Sardinia Channel |
| DI3  | Sicily Strait    |
| DJ1  | Adriatic North   |
| DJ2  | Adriatic Middle  |
| DJ3  | Adriatic South   |

| CODE | AREA                 |
|------|----------------------|
| DJ6  | Ionian North-West    |
| DJ4  | Ionian North-East    |
| DJ7  | Ionian Middle-West   |
| DJ8  | Ionian Middle-East   |
| DJ5  | Ionian South         |
| DH1  | Aegean North         |
| DH2  | Aegean South         |
| DH3  | Cretan Passage       |
| DL1  | Levantine North      |
| DL2  | Levantine North-East |
| DL3  | Levantine South      |
| DL4  | Levantine South-East |
| ATL1 | Gulf Cadiz           |
| ATL2 | Atlantic             |

**Table S4. Adjustment table for CARIMED cruises, corrections are additive for CTDSAL, TCARBN, ALKALI, and PH\_TOT\_25C, and multiplicative for OXYGEN, NITRAT, PHSPHT, and SILCAT. Cruises are identified with the cruise number, alias, and EXPOCODE as in Tables 1 and S1. NaN indicates that the variable was not measured in the corresponding cruise and -888 indicates that no 2QC was possible. The CARIMED adjustment workbench is hosted in GEOMAR (<https://carimed.geomar.de/>).**

[illegible]

|    |                 |              |        |     |      |      |      |     |      |      |
|----|-----------------|--------------|--------|-----|------|------|------|-----|------|------|
| 32 | CRELEV          | 36AE20160602 | 0      | 0%  | 20%  | -15% | 15%  | 15  | -777 | 0    |
| 33 | MC24IS          | 47SK19831005 | -0.015 | -4% | -15% | -14% | 10%  | NaN | 5    | 0    |
| 34 | MC26IS          | 47SK19840522 | 0      | -2% | -20% | -30% | -7%  | NaN | 12   | -888 |
| 35 | MC30IS          | 47SK19841204 | 0      | -4% | -25% | 0%   | 0%   | NaN | 0    | 0    |
| 36 | POEM05IS        | 47SK19870824 | 0      | 2%  | -15% | NaN  | -30% | NaN | 0    | 0    |
| 37 | POEM06IS        | 47SK19880807 | 0      | 0%  | NaN  | NaN  | NaN  | NaN | 30   | -888 |
| 38 | OC_2015         | 48QL20150804 | -0.01  | 0%  | 0%   | 0%   | 0%   | NaN | 0    | 0    |
| 39 | TRANSMED_LEGIII | 48UN20070613 | 0      | 0%  | 10%  | 0%   | 0%   | NaN | 10   | 0    |
| 40 | URANIA_MAI2     | 48UR19970830 | 0      | NaN | NaN  | NaN  | NaN  | NaN | NaN  | NaN  |
| 41 | URANIA_MAI7     | 48UR19990211 | 0      | NaN | NaN  | NaN  | NaN  | NaN | NaN  | NaN  |
| 42 | TRANSMED_LEGII  | 48UR20070528 | 0      | 0%  | 0%   | 0%   | 0%   | NaN | 6    | 0    |
| 43 | SESAME_IT01     | 48UR20080215 | 0      | -2% | 20%  | 10%  | 0%   | NaN | 0    | 0    |
| 44 | SESAME_IT02     | 48UR20080301 | 0      | 0%  | 10%  | -15% | -8%  | NaN | 0    | 0    |
| 45 | SESAME_IT04     | 48UR20080318 | 0      | 0%  | -10% | 0%   | 0%   | 0   | 0    | NaN  |
| 46 | SESAME_IT07     | 48UR20081007 | 0      | 0%  | 0%   | -10% | -15% | NaN | 0    | 0    |



## References

Manca, M., Burca, M., Giorgetti, A., Coatanoan, C., Garcia, M.-J., and Iona, A.: Physical and biochemical averaged vertical profiles in the Mediterranean regions: an important tool to trace the climatology of water masses and to validate incoming data from operational oceanography, *J. Mar. Syst.*, 48, 83-116, doi:10.1016/j.jmarsys.2003.11.025, 2004.
